# Supplementary material
Source: PubMed Central journal article supplement (PMC7895539)
Supplement: Supplementary_Data.pdf [file Supplementary_Data.pdf]

Figure S1. Expression of ST3GAL6-AS1 in MM cell lines. ST3GAL6-AS1 was upregulated in MM cells compared with normal plasma cells. \*\*P<0.01 vs. NPC. NPC, normal plasma cell; MM, multiple myeloma.

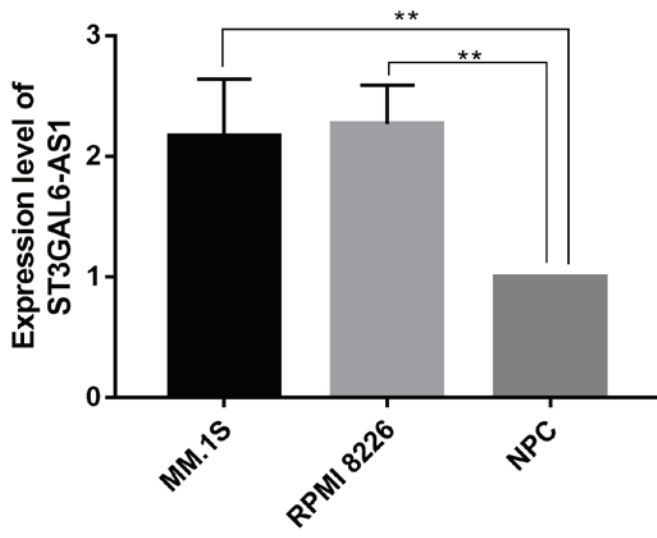

Figure S2. Effect of long non-coding RNA ST3GAL6-AS1 on proliferation, cell cycle and apoptosis of MM cells *in vitro*. (A) Efficiency of ST3GAL6-AS1-knockdown was measured by reverse transcription-quantitative PCR. After ST3GAL6-AS1 knockdown, the MM cell lines exhibited no significant change in (B) cell proliferation, (C) cell cycle and (D) apoptosis. \*\* $P < 0.01$  and \*\*\* $P < 0.001$  vs. si-NC. MM, multiple myeloma; si, small interfering; NC, negative control.

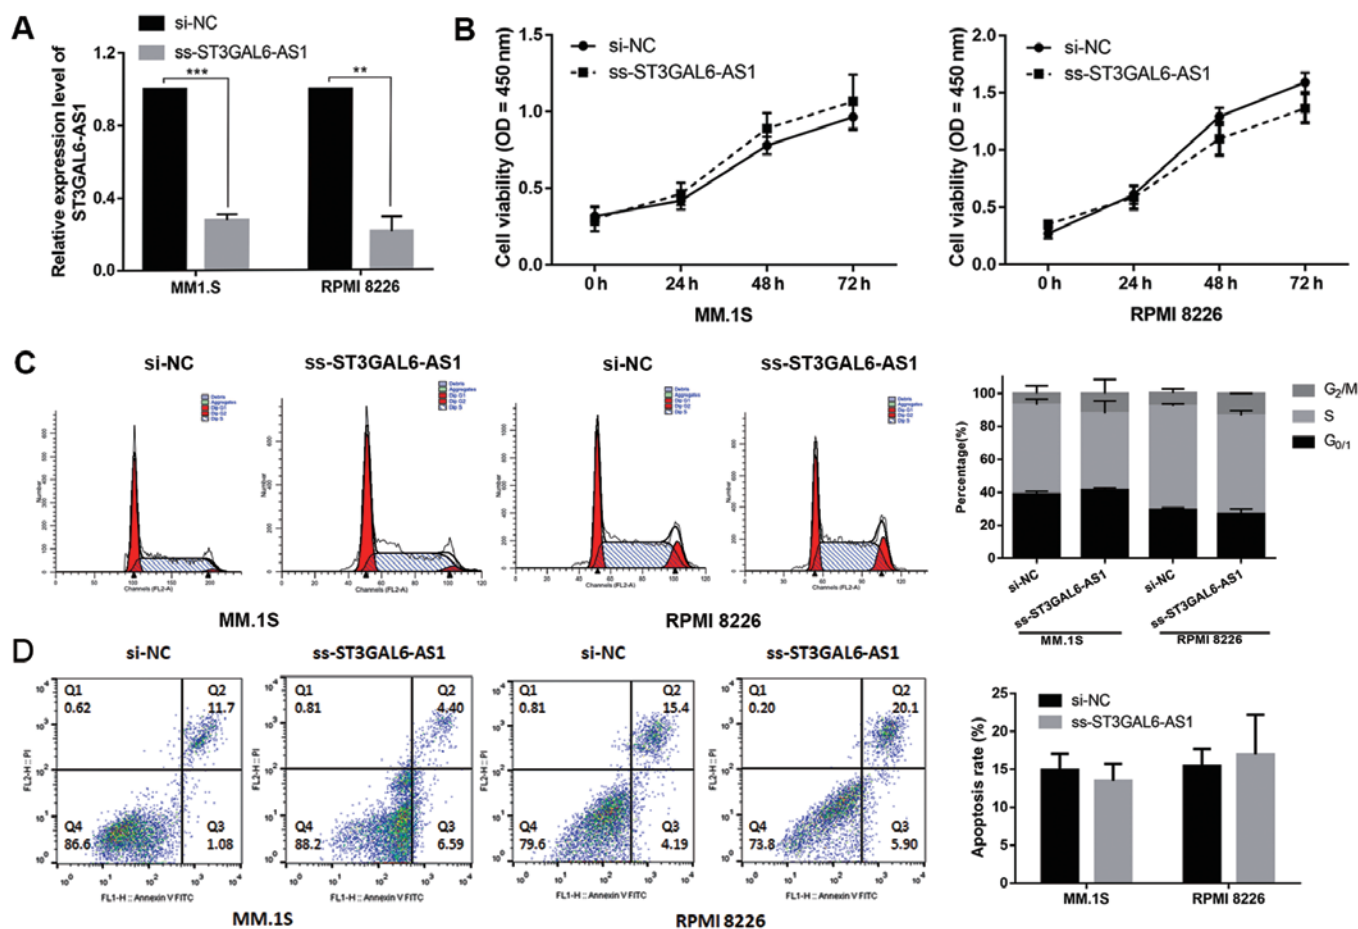

Figure S3. Expression level of ST3GAL6 in multiple myeloma. Expression of ST3GAL6 gene was compared in five healthy donors and 133 patients.

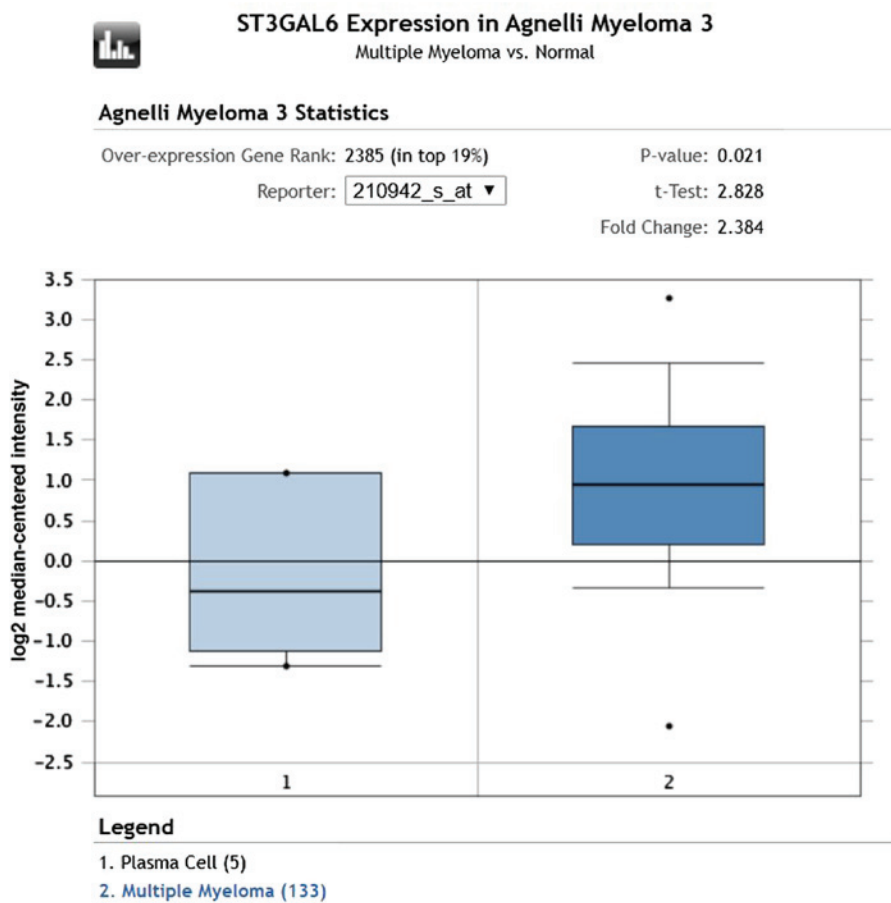

Figure S4. Knockdown of ST3GAL6 inhibited the ability of (A and B) adhesion, (C) migration and (D) invasion of multiple myeloma cell lines. \* $P < 0.05$ , \*\* $P < 0.01$ , \*\*\* $P < 0.001$  vs. NC. si, small interfering; NC, negative control.

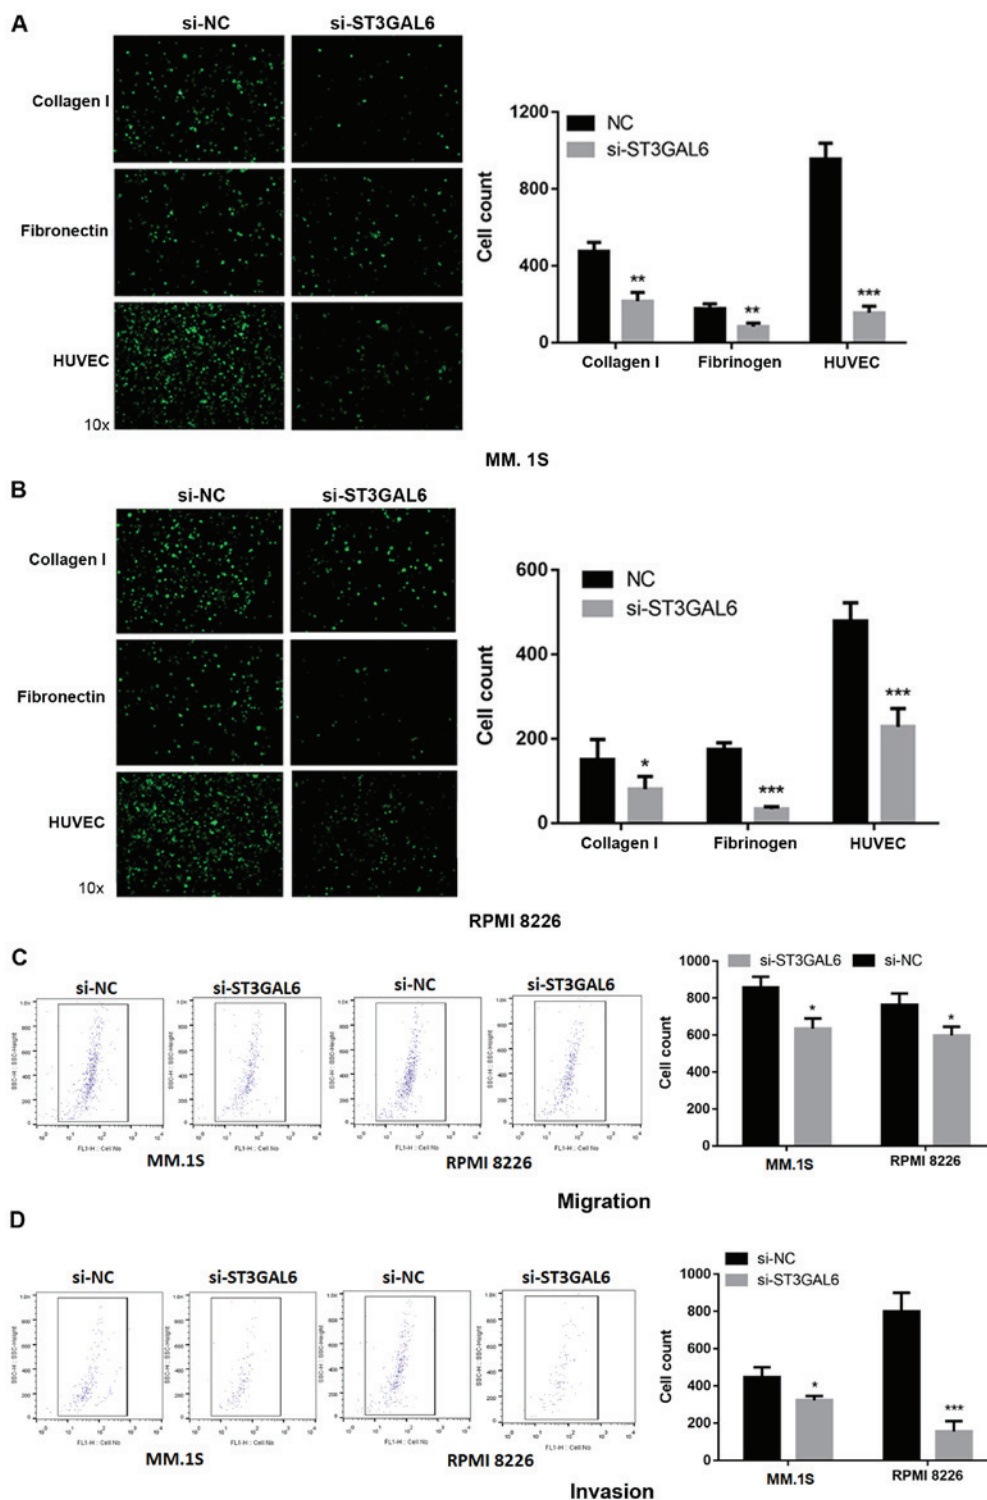

Figure S5. Knockdown of ST3GAL6 had no influence on (A and B) cell proliferation, (C) cell cycle and (D) apoptosis of multiple myeloma cell lines. si, small interfering; NC, negative control.

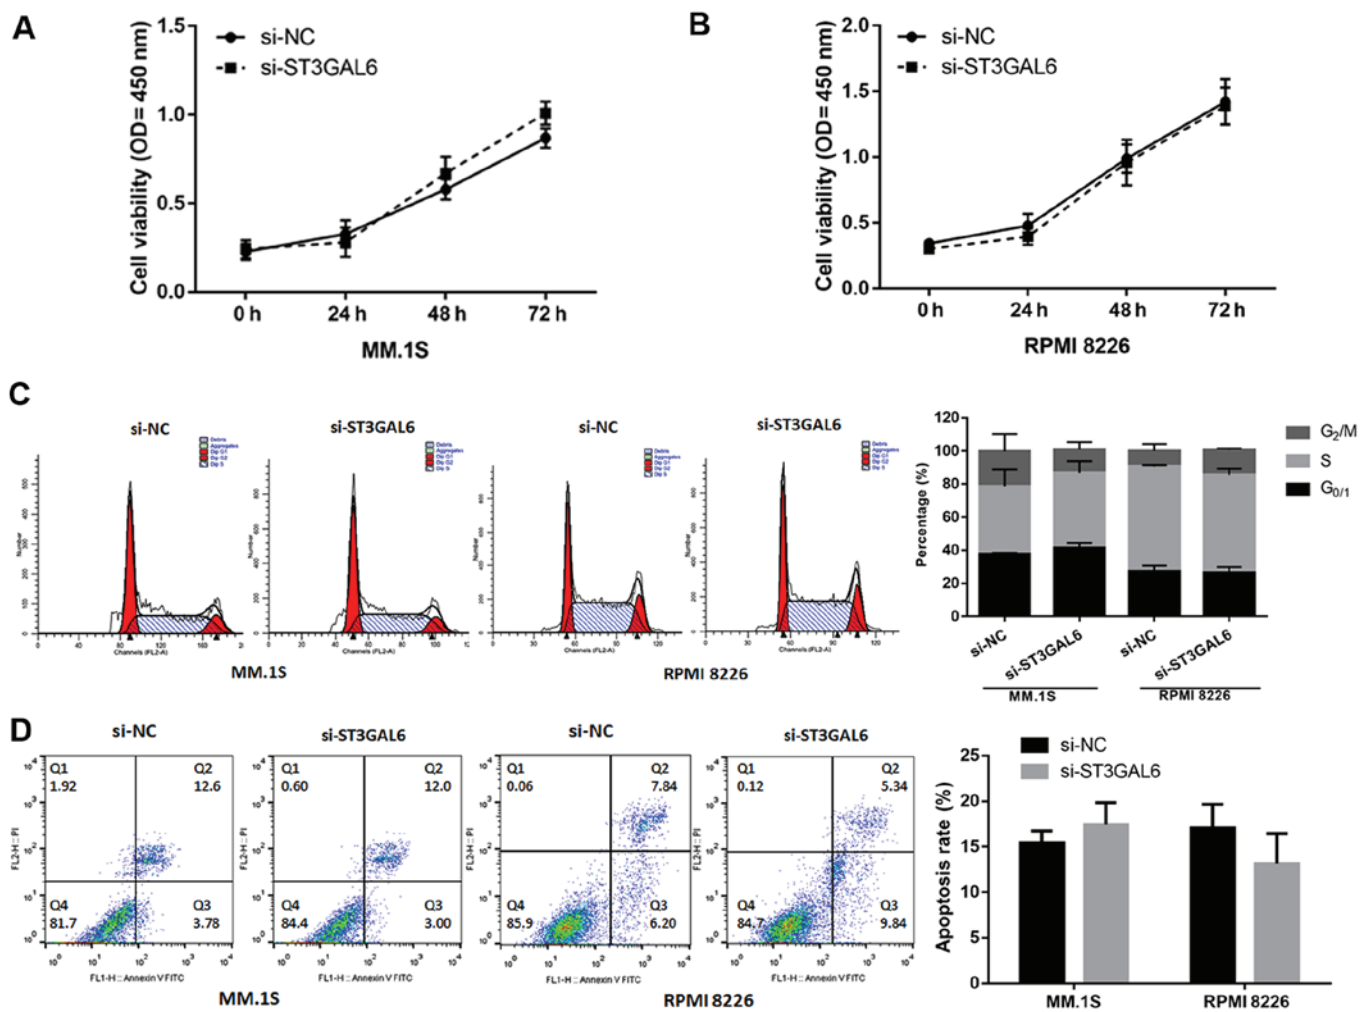

Figure S6. Expression level of hnRNPA2B1 in multiple myeloma. Expression of hnRNPA2B1 gene was compared in five healthy donors and 133 patients. hnRNPA2B1, heterogeneous nuclear ribonucleoprotein A2B1.

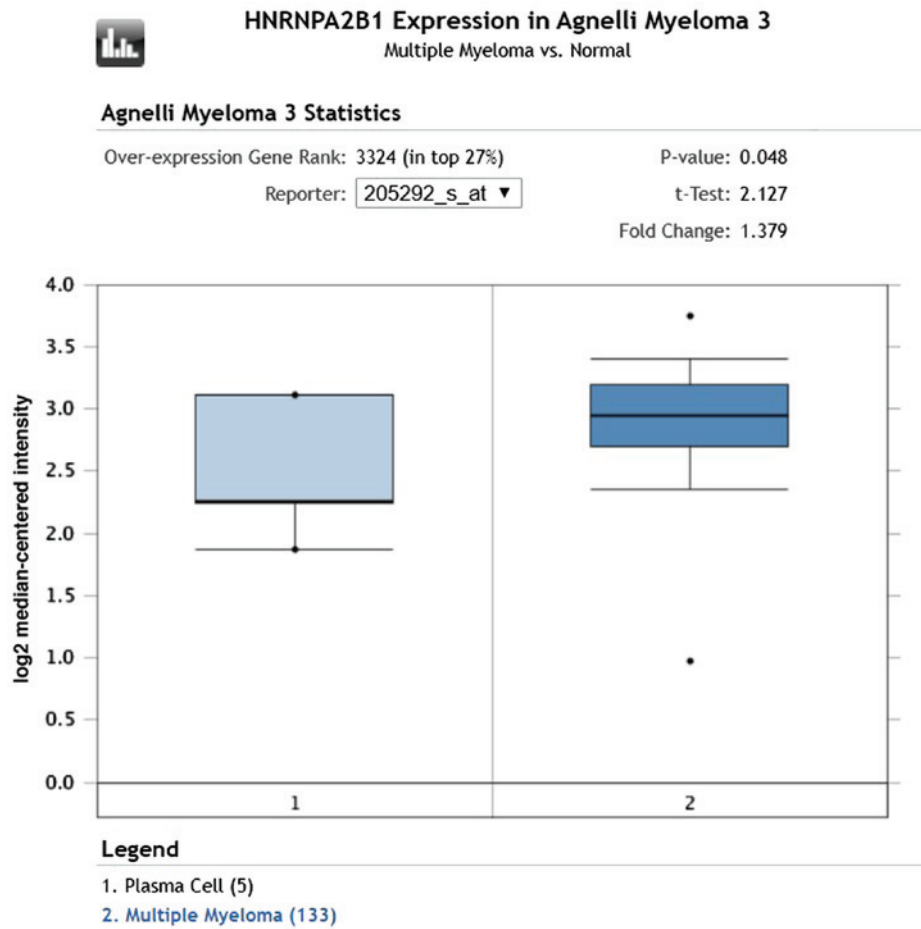

Table SI. Electroporation conditions.

| Cell line | PpV, V | PpOn, ms | PpOff, ms | PdV, V | PdOn, ms | PdOff, ms | PdCycle |
|-----------|--------|----------|-----------|--------|----------|-----------|---------|
| MM.1S     | 180    | 8        | 10        | 25     | 50       | 50        | 10      |
| RPMI 8226 | 130    | 10       | 10        | 30     | 50       | 50        | 10      |

Pp, poration pulse; PpOn, pulse length of Pp; PpOff, pulse interval of Pp; Pd, driving pulse; PdOn, pulse length of Pd; PdOff, pulse interval of Pd; PdCycle, cycle of Pd.

Table SII. siRNA sequences of ST3GAL6 and hnRNPA2B1.

| Gene      | Sense, 5'-3'          | Antisense, 5'-3'      |
|-----------|-----------------------|-----------------------|
| ST3GAL6   | GCUGAGGUUCAUCAGUUUTT  | AAACUGAUGAAACCUCAGCTT |
|           | CCCUAAUACGACAGUGAUUTT | AAUCACUGUCGUAAUAGGGTT |
|           | CCCAACAACAGGAAUUAUUTT | AAUAAUCCUGUUGUUGGGTT  |
| hnRNPA2B1 | GCGGAAUUAAGAAGAUACTT  | GUAUCUUCUUAAUUCGCTT   |
|           | GGACCAGGAAGUAACUUUATT | UAAAGUUACUCCUGGUCCTT  |
|           | GGAGGUGGUUAUGACAACUTT | AGUUGUCAUAACCACCUCCTT |

ST3GAL6, ST3  $\beta$ -galactoside  $\alpha$ -2,3-sialyltransferase 6; hnRNPA2B1, heterogeneous nuclear ribonucleoprotein A2B1.



Table SIII. Primer sequences of the detected RNAs.

| RNA            | Forward primer, 5'-3'  | Reverse primer, 5'-3'   |
|----------------|------------------------|-------------------------|
| ST3GAL6-AS1    | CAGCACAGAATCCTGACAAACC | CCAGCATTGTTGGTAAGAGCAT  |
| ST3GAL6        | TTGCCTCTCTGCTGAGGTTT   | CCTCCATTACCAACCACCAC    |
| hnRNPA2B1      | AAGACACCAGAGCAGATG     | CAATCCTTCCTCCACAGTAA    |
| $\beta$ -actin | GTGGCCGAGGACTTTGATTG   | CCTGTAACAACGCATCTCATATT |

ST3GAL6, ST3  $\beta$ -galactoside  $\alpha$ -2,3-sialyltransferase 6; AS1, antisense RNA 1; hnRNPA2B1, heterogeneous nuclear ribonucleoprotein A2B1.
